# Supplementary material for: Extending Treatment Networks in Health Technology Assessment: How Far Should We Go?
Source: PubMed Central journal article supplement (PMC4553939; doi:10.1016/j.jval.2015.03.1792), 2015-07
Supplement: mmc1.pdf [file mmc1.pdf]

## Appendix 1: Computing posterior precision $P_{AB}^{NMA}$

Let  $y$  be a vector of treatment effect estimates (for example log-odds ratios) from the  $n$  studies included in the NMA with corresponding empirical covariance matrix  $\Sigma_y$ , which is a diagonal matrix with the study-specific variances (standard errors squared) on the diagonal. We assume a Normal likelihood:

$$y \sim N(\mu, \Sigma_y)$$

where  $\mu$  is a vector of  $n$  study-specific mean treatment effects, that are related to the vector of  $p$  basic parameters,  $\beta = (\theta_{AB}, \theta_{AC}, \theta_{AD}, \dots)$ , through a design matrix  $X$  that describes the consistency relations (equation 1). For example in a 4 treatment network with treatments {A,B,C,D} the row of  $X$  corresponding to an AB study would be (1,0,0), for an AD study it would be (0,0,1), for a BC study it would be (-1,1,0), for a CD study it would be (0,-1,1) etc.

For a fixed effect model  $\mu = X\beta$ , and the standard weighted least-squares regression solution(1) gives:

$$\hat{\beta} \sim N\left(\left(X^T \Sigma^{-1} X\right)^{-1} X^T \Sigma^{-1} y, \left(X^T \Sigma^{-1} X\right)^{-1}\right). \quad (\text{A1.1})$$

$P_{AB}^{NMA}$  is the reciprocal of the (1,1)th element of  $\left(X^T \Sigma^{-1} X\right)^{-1}$ . We note that this does not depend on the observed treatment effect estimates,  $y$ .

For a random effects model  $\mu \sim N(X\beta, \Sigma_\mu)$  where  $\Sigma_\mu$  is a diagonal matrix with each element of the diagonal equal to the between study variance,  $\tau$ . We assume that the between study variance  $\tau$  is known and fixed, and give independent flat Normal priors for the basic parameters  $\beta$  with prior precision tending to 0. We follow Gelman et al (2004)(2) section 15.3 to write the hierarchical random effects model as a single normal regression model by extending the data and parameters as follows. The single normal regression model is:

$$y_* \sim N(X_* \gamma_*, \Sigma_*) \quad (\text{A1.2})$$

where we define

$y_* = (y, 0_n, 0_p)$  where  $0_n$  is a vector of  $n$  0's,

$$X_* = \begin{bmatrix} \mathbf{I}_{n \times n} & \mathbf{0}_{n \times p} \\ \mathbf{I}_{n \times n} & -X \\ \mathbf{0}_{p \times n} & \mathbf{I}_{p \times p} \end{bmatrix} \text{ where } \mathbf{0}_{n \times p} \text{ is an } n \times p \text{ matrix of 0's and } \mathbf{I}_{n \times n} \text{ an } n \times n \text{ identity matrix,} \quad (\text{A1.3})$$

$\gamma_* = (\boldsymbol{\mu}, \boldsymbol{\beta})$ , and

$\Sigma_*$  a diagonal  $((2n+p) \times (2n+p))$  matrix with the diagonal equal to the  $n$  study-specific variances, the between study variance repeated  $n$  times, and 0 repeated  $p$  times. (A1.4)

The weighted least squares solution given in equation (A1.1) can be applied to the model (A1.2) to give the posterior for the extended parameter vector  $\gamma_*$  (also given in the 1<sup>st</sup> edition of Gelmans book(3):

$$\gamma_* \sim N\left(\left(X_*^T \Sigma_*^{-1} X_*\right)^{-1} X_*^T \Sigma_*^{-1} y_*, \left(X_*^T \Sigma_*^{-1} X_*\right)^{-1}\right). \quad (\text{A1.5})$$

Note that we are only interested in the precision of the basic parameters, which is the bottom right  $p \times p$  sub-matrix of  $\left(X_*^T \Sigma_*^{-1} X_*\right)^{-1}$ , and in particular the precision  $P_{AB}^{NMA}$  of  $\theta_{AB}$  is the  $(n+1, n+1)$ th element of  $\left(X_*^T \Sigma_*^{-1} X_*\right)^{-1}$ . Note that this also does not depend on the magnitude of the observed treatment effect estimates,  $y$ . We can compute  $\left(X_*^T \Sigma_*^{-1} X_*\right)^{-1}$  for a given design matrix  $X$ , study-specific empirical variances,  $\Sigma_y$ , and between study variance  $\tau$ . We computed this using the statistical software R (<http://www.r-project.org/>). Note that due to the zero elements in the bottom  $p$  rows of  $X_*$  and  $\Sigma_*$ ,  $\left(X_*^T \Sigma_*^{-1} X_*\right)^{-1}$  is unchanged if these  $p$  rows are omitted from the computation, and we take advantage of this in our R code.

### Example R code for the Fixed Effect Model

```
#V is a vector of variances for the observed data
V<-c(1,1,1,1,1)

#Design matrix
ndata<-5 # number of data inputs
npars<-3 # number of basic parameters (=number of treatments minus 1)
X<- matrix(c(1,0,0, 0,1,0, -1,1,0, -1,0,1, 0,-1,1), ndata,npars,byrow=T) #design matrix where 1,0,0
denotes AB parameter, 0,1,0 AC parameter, -1,1,0 BC parameter, -1,0,1 BD parameter and 0,-1,1 CD parameter.
#Sigma is a covariance matrix for the observed data, and P the precision matrix (P = inverse of Sigma)
Sigma<-diag(V,ndata,ndata)
P<-diag(1/V,ndata,ndata)

#Compute covariance matrix for the pooled NMA estimates
PX<-P%*%X #Performs matrix multiplication PX
Z<-t(X)%*%PX #Performs matrix multiplication XPX
Var<-solve(Z) #Finds the inverse of XPX. Var is the covariance matrix given in eq.
(A1.1)
VarAB<-Var[1,1] #Variance of AB estimate is the [1,1]th element of Var
VarAB #estimate of variance for the AB parameter
```

### Example R code for the Random Effects Model based on Gelman et al (2004)

```
#V is a vector of variances for the observed data
V<-c(1,1,1,1,1)

#tausq is the between studies heterogeneity parameter
tausq<-0.5

#Design matrix
ndata<-5 # number of data inputs
npars<-3 # number of basic parameters (=number of treatments minus 1)
X<- matrix(c(1,0,0, 0,1,0, -1,1,0, -1,0,1, 0,-1,1), ndata,npars,byrow=T) #design matrix where 1,0,0
denotes AB parameter, 0,1,0 AC parameter, -1,1,0 BC parameter, -1,0,1 BD parameter and 0,-1,1 CD parameter.

#Augmented design matrix to allow for hierarchical structure (A1.3)
X1<-diag(,ndata,ndata)
```

```

X0<-matrix(rep(0,ndata*npars),ndata,npars)
Xstar<-rbind(cbind(X1,X0),cbind(X1,X))

#Augmented precision matrix to allow for hierarchical structure (A1.4)
Vstar<-c(V,rep(tausq,ndata))
Pstar<-diag(1/Vstar,2*ndata,2*ndata)

#Compute covariance matrix for the pooled NMA estimates (A1.5)
XP<-Pstar%%Xstar          #Performs matrix multiplication PX
Z<-t(Xstar)%%XP          #Performs matrix multiplication XPX
Var<-solve(Z)             #Finds the inverse of XPX. Var is the covariance matrix given in equation (A1.4)
VarAB<-Var[(ndata+1),(ndata+1)] #Variance of AB estimate is the [ndata+1,ndata+1]th element of Var
VarAB                     #estimate of variance for the AB parameter

```

#### References

1. Hedges LV, Olkin I. Statistical Methods for Meta-analysis. London: Academic Press; 1985.
2. Gelman A, Carlin JB, Stern HS, Rubin DB. Bayesian Data Analysis. 2nd ed: Chapman & Hall; 2004.
3. Gelman A, Carlin JG, Stern HS, Rubin DB. Bayesian data analysis. 1st ed. London: Chapman and Hall; 1995.

## Appendix 1: supplementary tables

|                            |          | Variance assumed under each scenario |                                              |                                              |                                                |                                                |
|----------------------------|----------|--------------------------------------|----------------------------------------------|----------------------------------------------|------------------------------------------------|------------------------------------------------|
|                            |          | <i>1 trial per comparison (1)</i>    | <i>AB weakest link, IC trials weaker (2)</i> | <i>AB weakest link, IC trials strong (3)</i> | <i>AB strongest link, IC trials weaker (4)</i> | <i>AB strongest link, IC trials strong (5)</i> |
| <b>Network Comparisons</b> | AB       | 1                                    | 2                                            | 2                                            | 0.2                                            | 0.2                                            |
|                            | AC to BF | 1                                    | 1.33                                         | 0.5                                          | 0.5                                            | 0.33                                           |
|                            | CD to EF | 1                                    | 1                                            | 0.2                                          | 1                                              | 0.33                                           |

**Table 1:** Explanation of variance assumed under each of the five scenarios considered.

**Star network: In tables 2 to 5 the following scenarios are reported:**

**Scenario 1:** “1 trial per comparison”: Equal variance across the network. Each comparison XY represents 1 meta-analysis with variance equal to 1.

**Scenario 2:** “AB weakest link, IC trials weaker” AB comparison is the ‘weakest’ link, with the comparisons forming indirect comparisons being weaker.

**Scenario 3:** “AB weakest link, IC trials strong” AB comparison is the ‘weakest’ link, with the comparisons forming indirect comparisons being stronger.

**Scenario 4:** “AB strongest link, IC trials weaker”: AB comparison is the ‘strongest’ link, with the comparisons forming indirect comparisons being weaker.

**Scenario 5:** “AB strongest link, IC trials strong” AB comparison is the ‘strongest’ link, with the comparisons forming indirect comparisons also being strong.

| Fig. | Direct evidence available    | 1 trial per comparison (1) |      |            | AB weakest link, IC trials weaker (2) |      |            | AB weakest link, IC trials strong (3) |      |            | AB strongest link, IC trials weaker (4) |      |            | AB strongest link, IC trials strong (5) |       |            |
|------|------------------------------|----------------------------|------|------------|---------------------------------------|------|------------|---------------------------------------|------|------------|-----------------------------------------|------|------------|-----------------------------------------|-------|------------|
|      |                              | Std MA                     | NMA  | Increase % | Std MA                                | NMA  | Increase % | Std MA                                | NMA  | Increase % | Std MA                                  | NMA  | Increase % | Std MA                                  | NMA   | Increase % |
| 1b   | AB AC AD AE AF               | 1.00                       | 1.00 | 0          | 0.50                                  | 0.50 | 0          | 0.50                                  | 0.50 | 0          | 5.00                                    | 5.00 | 0          | 5.00                                    | 5.00  | 0          |
| 1c   | + BC                         | 1.00                       | 1.50 | 50         | 0.50                                  | 0.88 | 75         | 0.50                                  | 1.50 | 200        | 5.00                                    | 6.00 | 20         | 5.00                                    | 6.50  | 30         |
| 1d   | + BC BD                      | 1.00                       | 2.00 | 100        | 0.50                                  | 1.25 | 150        | 0.50                                  | 2.50 | 400        | 5.00                                    | 7.00 | 40         | 5.00                                    | 8.00  | 60         |
| 1e   | + BC BD BE                   | 1.00                       | 2.50 | 150        | 0.50                                  | 1.63 | 225        | 0.50                                  | 3.50 | 600        | 5.00                                    | 8.00 | 60         | 5.00                                    | 9.50  | 90         |
| 1e   | + BC BD BE BF                | 1.00                       | 3.00 | 200        | 0.50                                  | 2.00 | 300        | 0.50                                  | 4.50 | 800        | 5.00                                    | 9.00 | 80         | 5.00                                    | 11.01 | 120        |
| -    | + BC BD BE BF CD             | 1.00                       | 3.00 | 200        | 0.50                                  | 2.00 | 300        | 0.50                                  | 4.50 | 800        | 5.00                                    | 9.00 | 80         | 5.00                                    | 11.01 | 120        |
| -    | + BC BD BE BF CD CE          | 1.00                       | 3.00 | 200        | 0.50                                  | 2.00 | 300        | 0.50                                  | 4.50 | 800        | 5.00                                    | 9.00 | 80         | 5.00                                    | 11.01 | 120        |
| -    | + BC BD BE BF CD CE CF       | 1.00                       | 3.00 | 200        | 0.50                                  | 2.00 | 300        | 0.50                                  | 4.50 | 800        | 5.00                                    | 9.00 | 80         | 5.00                                    | 11.01 | 120        |
| -    | + BC BD BE BF CD CE CF DE    | 1.00                       | 3.00 | 200        | 0.50                                  | 2.00 | 300        | 0.50                                  | 4.50 | 800        | 5.00                                    | 9.00 | 80         | 5.00                                    | 11.01 | 120        |
| -    | + BC BD BE BF CD CE CF DE DF | 1.00                       | 3.00 | 200        | 0.50                                  | 2.00 | 300        | 0.50                                  | 4.50 | 800        | 5.00                                    | 9.00 | 80         | 5.00                                    | 11.01 | 120        |
| 1f   | Entire network connected     | 1.00                       | 3.00 | 200        | 0.50                                  | 2.00 | 300        | 0.50                                  | 4.50 | 800        | 5.00                                    | 9.00 | 80         | 5.00                                    | 11.01 | 120        |

**Table 2 Fixed effect analysis for a star network with 6 treatments. Comparison of precision gained for treatment contrast A vs B from expanding network of treatments under five separate scenarios with that achieved from a standard, pairwise meta-analysis.** Columns report the precision of A vs B treatment effect estimate (log odds scale) from a pairwise meta-analysis of A vs B (std MA), the precision of A vs B from a network meta-analysis (NMA) and the percentage difference between NMA and std MA (Increase %). Each increasing level of the network is illustrated with reference to Figure 1 in main paper. Explanation of variances assumed for each comparison given in Table 1 above.

| Figure | Direct evidence available    | 1 trial per comparison (1) |      |     | AB weakest link, IC trials weaker (2) |      |     | AB weakest link, IC trials strong (3) |      |     | AB strongest link, IC trials weaker (4) |      |     | AB strongest link, IC trials strong (5) |      |          |
|--------|------------------------------|----------------------------|------|-----|---------------------------------------|------|-----|---------------------------------------|------|-----|-----------------------------------------|------|-----|-----------------------------------------|------|----------|
|        |                              | Std                        |      | %   | Std                                   |      | %   | Std                                   |      | %   | Std                                     |      | %   | Std                                     |      | Increase |
|        |                              | MA                         | NMA  | e   | MA                                    | NMA  | e   | MA                                    | NMA  | e   | MA                                      | NMA  | e   | MA                                      | NMA  | e        |
| 1b     | AB AC AD AE AF               | 0.91                       | 0.91 | 0   | 0.48                                  | 0.48 | 0   | 0.48                                  | 0.48 | 0   | 3.33                                    | 3.33 | 0   | 3.33                                    | 3.33 | 0        |
| 1c     | + BC                         | 0.91                       | 1.36 | 50  | 0.48                                  | 0.83 | 73  | 0.48                                  | 1.31 | 175 | 3.33                                    | 4.17 | 25  | 3.33                                    | 4.49 | 35       |
| 1e     | + BC BD                      | 0.91                       | 1.82 | 100 | 0.48                                  | 1.17 | 147 | 0.48                                  | 2.14 | 350 | 3.33                                    | 5    | 50  | 3.33                                    | 5.64 | 69       |
| 1e     | + BC BD BE                   | 0.91                       | 2.27 | 150 | 0.48                                  | 1.52 | 220 | 0.48                                  | 2.98 | 525 | 3.33                                    | 5.83 | 75  | 3.33                                    | 6.8  | 104      |
| 1e     | + BC BD BE BF                | 0.91                       | 2.73 | 200 | 0.48                                  | 1.87 | 293 | 0.48                                  | 3.81 | 700 | 3.33                                    | 6.67 | 100 | 3.33                                    | 7.95 | 139      |
| -      | + BC BD BE BF CD             | 0.91                       | 2.73 | 200 | 0.48                                  | 1.87 | 293 | 0.48                                  | 3.81 | 700 | 3.33                                    | 6.67 | 100 | 3.33                                    | 7.95 | 139      |
| -      | + BC BD BE BF CD CE          | 0.91                       | 2.73 | 200 | 0.48                                  | 1.87 | 293 | 0.48                                  | 3.81 | 700 | 3.33                                    | 6.67 | 100 | 3.33                                    | 7.95 | 139      |
| -      | + BC BD BE BF CD CE CF       | 0.91                       | 2.73 | 200 | 0.48                                  | 1.87 | 293 | 0.48                                  | 3.81 | 700 | 3.33                                    | 6.67 | 100 | 3.33                                    | 7.95 | 139      |
| -      | + BC BD BE BF CD CE CF DE    | 0.91                       | 2.73 | 200 | 0.48                                  | 1.87 | 293 | 0.48                                  | 3.81 | 700 | 3.33                                    | 6.67 | 100 | 3.33                                    | 7.95 | 139      |
| -      | + BC BD BE BF CD CE CF DE DF | 0.91                       | 2.73 | 200 | 0.48                                  | 1.87 | 293 | 0.48                                  | 3.81 | 700 | 3.33                                    | 6.67 | 100 | 3.33                                    | 7.95 | 139      |
| 1f     | Entire network connected     | 0.91                       | 2.73 | 200 | 0.48                                  | 1.87 | 293 | 0.48                                  | 3.81 | 700 | 3.33                                    | 6.67 | 100 | 3.33                                    | 7.95 | 139      |

**Table 3: Random effects analysis for a star network with 6 treatments. Comparison of precision gained for treatment contrast A vs B from expanding network of treatments under five separate scenarios with that achieved from a standard, pairwise meta-analysis. Assuming ‘low’ between trial heterogeneity ( $\tau^2 = 0.1$ ). Columns report the precision of A vs B treatment effect estimate from a pairwise meta-analysis of A vs B (std MA), the precision of A vs B from a network meta-analysis (NMA) and the percentage difference between NMA and std MA (Increase %). Each increasing level of the network is illustrated with reference to Figure 1 in main paper. Explanation of variances assumed for each comparison given in Table 1 above.**



| Figure | Direct evidence available    | 1 trial per comparison (1) |      |            | AB weakest link, IC trials weaker (2) |      |            | AB weakest link, IC trials strong (3) |      |            | AB strongest link, IC trials weaker (4) |      |            | AB strongest link, IC trials strong (5) |      |            |
|--------|------------------------------|----------------------------|------|------------|---------------------------------------|------|------------|---------------------------------------|------|------------|-----------------------------------------|------|------------|-----------------------------------------|------|------------|
|        |                              | Std MA                     | NMA  | % Increase | Std MA                                | NMA  | % Increase | Std MA                                | NMA  | % Increase | Std MA                                  | NMA  | % Increase | Std MA                                  | NMA  | % Increase |
| 1b     | AB AC AD AE AF               | 0.67                       | 0.67 | 0          | 0.40                                  | 0.40 | 0          | 0.40                                  | 0.40 | 0          | 1.43                                    | 1.43 | 0          | 1.43                                    | 1.43 | 0          |
| 1c     | + BC                         | 0.67                       | 1.00 | 50         | 0.40                                  | 0.67 | 68         | 0.40                                  | 0.90 | 125        | 1.43                                    | 1.93 | 35         | 1.43                                    | 2.03 | 42         |
| 1e     | + BC BD                      | 0.67                       | 1.33 | 100        | 0.40                                  | 0.95 | 136        | 0.40                                  | 1.40 | 250        | 1.43                                    | 2.43 | 70         | 1.43                                    | 2.63 | 84         |
| 1e     | + BC BD BE                   | 0.67                       | 1.67 | 150        | 0.40                                  | 1.22 | 205        | 0.40                                  | 1.90 | 375        | 1.43                                    | 2.93 | 105        | 1.43                                    | 3.23 | 126        |
| 1e     | + BC BD BE BF                | 0.67                       | 2.00 | 200        | 0.40                                  | 1.49 | 273        | 0.40                                  | 2.40 | 500        | 1.43                                    | 3.43 | 140        | 1.43                                    | 3.83 | 168        |
| -      | + BC BD BE BF CD             | 0.67                       | 2.00 | 200        | 0.40                                  | 1.49 | 273        | 0.40                                  | 2.40 | 500        | 1.43                                    | 3.43 | 140        | 1.43                                    | 3.83 | 168        |
| -      | + BC BD BE BF CD CE          | 0.67                       | 2.00 | 200        | 0.40                                  | 1.49 | 273        | 0.40                                  | 2.40 | 500        | 1.43                                    | 3.43 | 140        | 1.43                                    | 3.83 | 168        |
| -      | + BC BD BE BF CD CE CF       | 0.67                       | 2.00 | 200        | 0.40                                  | 1.49 | 273        | 0.40                                  | 2.40 | 500        | 1.43                                    | 3.43 | 140        | 1.43                                    | 3.83 | 168        |
| -      | + BC BD BE BF CD CE CF DE    | 0.67                       | 2.00 | 200        | 0.40                                  | 1.49 | 273        | 0.40                                  | 2.40 | 500        | 1.43                                    | 3.43 | 140        | 1.43                                    | 3.83 | 168        |
| -      | + BC BD BE BF CD CE CF DE DF | 0.67                       | 2.00 | 200        | 0.40                                  | 1.49 | 273        | 0.40                                  | 2.40 | 500        | 1.43                                    | 3.43 | 140        | 1.43                                    | 3.83 | 168        |
| 1f     | Entire network connected     | 0.67                       | 2.00 | 200        | 0.40                                  | 1.49 | 273        | 0.40                                  | 2.40 | 500        | 1.43                                    | 3.43 | 140        | 1.43                                    | 3.83 | 168        |

**Table 4: Random effects analysis for a star network with 6 treatments. Comparison of precision gained for treatment contrast A vs B from expanding network of treatments under five separate scenarios with that achieved from a standard, pairwise meta-analysis. Assuming ‘medium’ between trial heterogeneity ( $\tau^2 = 0.5$ ). Columns report the precision of A vs B treatment effect estimate from a pairwise meta-analysis of A vs B (std MA), the precision of A vs B from a network meta-analysis (NMA) and the percentage difference between NMA and std MA (Increase %). Each increasing level of the network is illustrated with reference to Figure 1 in main paper. Explanation of variances assumed for each comparison given in Table 1 above.**

| Fig | Direct evidence available    | 1 trial per comparison (1) |      |            | AB weakest link, IC trials weaker (2) |      |            | AB weakest link, IC trials strong (3) |      |            | AB strongest link, IC trials weaker (4) |      |            | AB strongest link, IC trials strong (5) |      |            |
|-----|------------------------------|----------------------------|------|------------|---------------------------------------|------|------------|---------------------------------------|------|------------|-----------------------------------------|------|------------|-----------------------------------------|------|------------|
|     |                              | Std MA                     | NMA  | % Increase | Std MA                                | NMA  | % Increase | Std MA                                | NMA  | % Increase | Std MA                                  | NMA  | % Increase | Std MA                                  | NMA  | % Increase |
| 1b  | AB AC AD AE AF               | 0.50                       | 0.5  | 0          | 0.33                                  | 0.33 | 0          | 0.33                                  | 0.33 | 0          | 0.83                                    | 0.83 | 0          | 0.83                                    | 0.83 | 0          |
| 1c  | + BC                         | 0.50                       | 0.75 | 50         | 0.33                                  | 0.55 | 66         | 0.33                                  | 0.67 | 102        | 0.83                                    | 1.17 | 41         | 0.83                                    | 1.21 | 46         |
| 1e  | + BC BD                      | 0.50                       | 1.00 | 100        | 0.33                                  | 0.76 | 131        | 0.33                                  | 1.00 | 203        | 0.83                                    | 1.50 | 81         | 0.83                                    | 1.58 | 91         |
| 1e  | + BC BD BE                   | 0.50                       | 1.25 | 150        | 0.33                                  | 0.98 | 196        | 0.33                                  | 1.33 | 304        | 0.83                                    | 1.83 | 121        | 0.83                                    | 1.96 | 136        |
| 1e  | + BC BD BE BF                | 0.50                       | 1.50 | 200        | 0.33                                  | 1.19 | 261        | 0.33                                  | 1.67 | 405        | 0.83                                    | 2.17 | 161        | 0.83                                    | 2.33 | 181        |
| -   | + BC BD BE BF CD             | 0.50                       | 1.50 | 200        | 0.33                                  | 1.19 | 261        | 0.33                                  | 1.67 | 405        | 0.83                                    | 2.17 | 161        | 0.83                                    | 2.33 | 181        |
| -   | + BC BD BE BF CD CE          | 0.50                       | 1.50 | 200        | 0.33                                  | 1.19 | 261        | 0.33                                  | 1.67 | 405        | 0.83                                    | 2.17 | 161        | 0.83                                    | 2.33 | 181        |
| -   | + BC BD BE BF CD CE CF       | 0.50                       | 1.50 | 200        | 0.33                                  | 1.19 | 261        | 0.33                                  | 1.67 | 405        | 0.83                                    | 2.17 | 161        | 0.83                                    | 2.33 | 181        |
| -   | + BC BD BE BF CD CE CF DE    | 0.50                       | 1.50 | 200        | 0.33                                  | 1.19 | 261        | 0.33                                  | 1.67 | 405        | 0.83                                    | 2.17 | 161        | 0.83                                    | 2.33 | 181        |
| -   | + BC BD BE BF CD CE CF DE DF | 0.50                       | 1.50 | 200        | 0.33                                  | 1.19 | 261        | 0.33                                  | 1.67 | 405        | 0.83                                    | 2.17 | 161        | 0.83                                    | 2.33 | 181        |
| 1f  | Entire network connected     | 0.50                       | 1.50 | 200        | 0.33                                  | 1.19 | 261        | 0.33                                  | 1.67 | 405        | 0.83                                    | 2.17 | 161        | 0.83                                    | 2.33 | 181        |

**Table 5: Random effects analysis for a star network with 6 treatments. Comparison of precision gained for treatment contrast A vs B from expanding network of treatments under five separate scenarios with that achieved from a standard, pairwise meta-analysis. Assuming ‘high’ between trial heterogeneity ( $\tau^2 = 1$ ). Columns report the precision of A vs B treatment effect estimate from a pairwise meta-analysis of A vs B (std MA), the precision of A vs B from a network meta-analysis (NMA) and the percentage difference between NMA and std MA (Increase %). Each increasing level of the network is illustrated with reference to Figure 1. Explanation of variances assumed for each comparison given in Table 1 above.**

**Tables 6 to 9: Absence of first-order indirect comparisons. The following scenarios are reported:**

**Scenario 1: “1 trial per comparison”:** Equal variance across the network. Each comparison XY represents 1 meta-analysis with variance equal to 1.

**Scenario 2: “1<sup>st</sup> order IC trials weak, 2<sup>nd</sup> order slightly stronger”:** comparisons forming 1<sup>st</sup> order indirect comparisons weak, 2<sup>nd</sup> order slightly stronger but still weak.

**Scenario 3: “1<sup>st</sup> order IC trials strong, 2<sup>nd</sup> order strong”:** comparisons forming 1<sup>st</sup> order indirect comparisons is strong but 2<sup>nd</sup> order IC stronger still.

**Scenario 4: “1<sup>st</sup> order IC trials strong, 2<sup>nd</sup> order weaker”:** comparisons forming indirect comparisons strong 2<sup>nd</sup> order being weaker.

**Scenario 5: “1<sup>st</sup> order IC trials strong, 2<sup>nd</sup> order strong”** comparisons forming indirect comparisons strong and 2<sup>nd</sup> order IC also being strong.

| Fig. | Direct evidence available                                    | 1 trial per comparison (1) |      |            | AB weakest link 1 <sup>st</sup> order IC trials weak, 2 <sup>nd</sup> order weak (2) |      |            | AB weakest link 1 <sup>st</sup> order IC trials strong, 2 <sup>nd</sup> order strong (3) |      |            | AB strongest link 1 <sup>st</sup> order IC trials strong, 2 <sup>nd</sup> order weaker (4) |      |            | AB strongest link 1 <sup>st</sup> order IC trials strong, 2 <sup>nd</sup> order strong (5) |       |            |
|------|--------------------------------------------------------------|----------------------------|------|------------|--------------------------------------------------------------------------------------|------|------------|------------------------------------------------------------------------------------------|------|------------|--------------------------------------------------------------------------------------------|------|------------|--------------------------------------------------------------------------------------------|-------|------------|
|      |                                                              | Std MA                     | NMA  | Increase % | Std MA                                                                               | NMA  | Increase % | Std MA                                                                                   | NMA  | Increase % | Std MA                                                                                     | NMA  | Increase % | Std MA                                                                                     | NMA   | Increase % |
| 2a   | AB (AD AE BC BF)                                             | 1.00                       | 1.00 | 0          | 0.50                                                                                 | 0.50 | 0          | 0.50                                                                                     | 0.50 | 0          | 5.00                                                                                       | 5.00 | 0          | 5.00                                                                                       | 5.00  | 0          |
| -    | 1 2 <sup>nd</sup> order loop                                 | 1.00                       | 1.33 | 33         | 0.50                                                                                 | 0.77 | 54         | 0.50                                                                                     | 1.33 | 166        | 5.00                                                                                       | 5.50 | 10         | 5.00                                                                                       | 6.01  | 20         |
| 2b   | 1 1 <sup>st</sup> order & 1 2 <sup>nd</sup> order loop       | 1.00                       | 1.83 | 83         | 0.50                                                                                 | 0.93 | 86         | 0.50                                                                                     | 1.93 | 286        | 5.00                                                                                       | 5.66 | 13         | 5.00                                                                                       | 6.52  | 30         |
| 2c   | 2 2 <sup>nd</sup> -order loops (2a CD EF)                    | 1.00                       | 1.67 | 67         | 0.50                                                                                 | 1.05 | 110        | 0.50                                                                                     | 2.17 | 334        | 5.00                                                                                       | 6.00 | 20         | 5.00                                                                                       | 7.02  | 40         |
| 2d   | 2 1 <sup>st</sup> order loops (2a AC AF)                     | 1.00                       | 2.00 | 100        | 0.50                                                                                 | 1.25 | 150        | 0.50                                                                                     | 2.50 | 400        | 5.00                                                                                       | 7.00 | 40         | 5.00                                                                                       | 8.03  | 61         |
| 2e   | 2 1 <sup>st</sup> & 2 2 <sup>nd</sup> order loops (2c & 2d)  | 1.00                       | 2.20 | 120        | 0.50                                                                                 | 1.42 | 184        | 0.50                                                                                     | 3.03 | 506        | 5.00                                                                                       | 7.28 | 46         | 5.00                                                                                       | 8.64  | 73         |
| 2f   | 4 1 <sup>st</sup> & 2 2 <sup>nd</sup> order loops (2e BD BE) | 1.00                       | 3.00 | 200        | 0.50                                                                                 | 2.00 | 300        | 0.50                                                                                     | 4.50 | 800        | 5.00                                                                                       | 9.00 | 80         | 5.00                                                                                       | 11.06 | 121        |
| 2g   | 4 1 <sup>st</sup> order loops (2a AC AF BD BE)               | 1.00                       | 3.00 | 200        | 0.50                                                                                 | 2.00 | 300        | 0.50                                                                                     | 4.50 | 800        | 5.00                                                                                       | 9.00 | 80         | 5.00                                                                                       | 11.06 | 121        |
| 2h   | Fully connected network                                      | 1.00                       | 3.00 | 200        | 0.50                                                                                 | 2.00 | 300        | 0.50                                                                                     | 4.50 | 800        | 5.00                                                                                       | 9.00 | 80         | 5.00                                                                                       | 11.06 | 121        |

**Table 6 Fixed effect analysis for investigating absence of 1<sup>st</sup> order indirect evidence. Comparison of precision gained for treatment contrast A vs B under five separate scenarios with that achieved from a standard, pairwise meta-analysis.** Columns report the precision of A vs B treatment effect estimate from a pairwise meta-analysis of A vs B (std MA), the precision of A vs B from a network meta-analysis (NMA) and the percentage difference between NMA and std MA (Increase %). Each increasing level of the network is illustrated with reference to Figure 2. Explanation of variances assumed for each comparison given in Table 1 in main paper.

| Fig. | Direct evidence available                                    | 1 trial per comparison (1) |      |            | AB weakest link<br>1 <sup>st</sup> order IC trials weak,<br>2 <sup>nd</sup> order weak (2) |      |            | AB weakest link<br>1 <sup>st</sup> order IC trials strong,<br>2 <sup>nd</sup> order strong (3) |      |            | AB strongest link<br>1 <sup>st</sup> order IC trials strong,<br>2 <sup>nd</sup> order weaker (4) |      |            | AB strongest link<br>1 <sup>st</sup> order IC trials strong,<br>2 <sup>nd</sup> order strong (5) |      |            |
|------|--------------------------------------------------------------|----------------------------|------|------------|--------------------------------------------------------------------------------------------|------|------------|------------------------------------------------------------------------------------------------|------|------------|--------------------------------------------------------------------------------------------------|------|------------|--------------------------------------------------------------------------------------------------|------|------------|
|      |                                                              | Std MA                     | NMA  | Increase % | Std MA                                                                                     | NMA  | Increase % | Std MA                                                                                         | NMA  | Increase % | Std MA                                                                                           | NMA  | Increase % | Std MA                                                                                           | NMA  | Increase % |
| 2a   | AB (AD AE BC BF)                                             | 0.91                       | 0.91 | 0          | 0.48                                                                                       | 0.48 | 0          | 0.48                                                                                           | 0.48 | 0          | 3.33                                                                                             | 3.33 | 0          | 3.33                                                                                             | 3.33 | 0          |
| -    | 1 2 <sup>nd</sup> order loop                                 | 0.91                       | 1.21 | 33         | 0.48                                                                                       | 0.73 | 52         | 0.48                                                                                           | 1.14 | 138        | 3.33                                                                                             | 3.77 | 13         | 3.33                                                                                             | 4.11 | 23         |
| 2b   | 1 1 <sup>st</sup> order & 1 2 <sup>nd</sup> order loop       | 0.91                       | 1.66 | 82         | 0.48                                                                                       | 1.08 | 125        | 0.48                                                                                           | 1.98 | 313        | 3.33                                                                                             | 4.60 | 38         | 3.33                                                                                             | 5.27 | 58         |
| 2c   | 2 2 <sup>nd</sup> -order loops (2a CD EF)                    | 0.91                       | 1.52 | 67         | 0.48                                                                                       | 0.98 | 104        | 0.48                                                                                           | 1.81 | 277        | 3.33                                                                                             | 4.20 | 26         | 3.33                                                                                             | 4.88 | 47         |
| 2d   | 2 1 <sup>st</sup> order loops (2a AC AF)                     | 0.91                       | 1.82 | 100        | 0.48                                                                                       | 1.18 | 146        | 0.48                                                                                           | 2.14 | 346        | 3.33                                                                                             | 5.00 | 50         | 3.33                                                                                             | 5.66 | 70         |
| 2e   | 2 1 <sup>st</sup> & 2 2 <sup>nd</sup> order loops (2d & 2c)  | 0.91                       | 2.00 | 120        | 0.48                                                                                       | 1.33 | 177        | 0.48                                                                                           | 2.56 | 433        | 3.33                                                                                             | 5.25 | 58         | 3.33                                                                                             | 6.12 | 84         |
| 2f   | 4 1 <sup>st</sup> & 2 2 <sup>nd</sup> order loops (2e BD BE) | 0.91                       | 2.73 | 200        | 0.48                                                                                       | 1.87 | 290        | 0.48                                                                                           | 3.81 | 694        | 3.33                                                                                             | 6.66 | 100        | 3.33                                                                                             | 7.98 | 140        |
| 2g   | 4 1 <sup>st</sup> order loops (2a AC AF BD BE)               | 0.91                       | 2.73 | 200        | 0.48                                                                                       | 1.87 | 290        | 0.48                                                                                           | 3.81 | 694        | 3.33                                                                                             | 6.66 | 100        | 3.33                                                                                             | 7.98 | 140        |
| 2h   | Fully connected network                                      | 0.91                       | 2.73 | 200        | 0.48                                                                                       | 1.87 | 290        | 0.48                                                                                           | 3.81 | 694        | 3.33                                                                                             | 6.66 | 100        | 3.33                                                                                             | 7.98 | 140        |

**Table 7: Random effects analysis for investigating absence of 1<sup>st</sup> order indirect evidence. Comparison of precision gained for treatment contrast A vs B under five separate scenarios with that achieved from a standard, pairwise meta-analysis. Assuming 'low' between trial heterogeneity ( $\tau^2 = 0.1$ ). Columns report the precision of A vs B treatment effect estimate from a pairwise meta-analysis of A vs B (std MA), the precision of A vs B from a network meta-analysis (NMA) and the percentage difference between NMA and std MA (Increase %). Each increasing level of the network is illustrated with reference to Figure 2. Explanation of variances assumed for each comparison given in Table 1 in main paper.**

| Fig. | Direct evidence available                                    | 1 trial per comparison (1) |      |            | AB weakest link<br>1 <sup>st</sup> order IC trials weak,<br>2 <sup>nd</sup> order weak (2) |      |            | AB weakest link<br>1 <sup>st</sup> order IC trials strong,<br>2 <sup>nd</sup> order strong (3) |      |            | AB strongest link<br>1 <sup>st</sup> order IC trials strong,<br>2 <sup>nd</sup> order weaker (4) |      |            | AB strongest link<br>1 <sup>st</sup> order IC trials strong,<br>2 <sup>nd</sup> order strong (5) |      |            |
|------|--------------------------------------------------------------|----------------------------|------|------------|--------------------------------------------------------------------------------------------|------|------------|------------------------------------------------------------------------------------------------|------|------------|--------------------------------------------------------------------------------------------------|------|------------|--------------------------------------------------------------------------------------------------|------|------------|
|      |                                                              | Std MA                     | NMA  | Increase % | Std MA                                                                                     | NMA  | Increase % | Std MA                                                                                         | NMA  | Increase % | Std MA                                                                                           | NMA  | Increase % | Std MA                                                                                           | NMA  | Increase % |
| 2a   | AB (AD AE BC BF)                                             | 0.66                       | 0.66 | 0          | 0.40                                                                                       | 0.40 | 0          | 0.40                                                                                           | 0.40 | 0          | 1.43                                                                                             | 1.43 | 0          | 1.43                                                                                             | 1.43 | 0          |
| -    | 1 2 <sup>nd</sup> order loop                                 | 0.66                       | 0.89 | 35         | 0.40                                                                                       | 0.59 | 48         | 0.40                                                                                           | 0.77 | 93         | 1.43                                                                                             | 1.71 | 20         | 1.43                                                                                             | 1.83 | 28         |
| 2b   | 1 1 <sup>st</sup> order & 1 2 <sup>nd</sup> order loop       | 0.66                       | 1.22 | 85         | 0.40                                                                                       | 0.87 | 118        | 0.40                                                                                           | 1.27 | 218        | 1.43                                                                                             | 2.21 | 55         | 1.43                                                                                             | 2.42 | 69         |
| 2c   | 2 2 <sup>nd</sup> -order loops (2a CD EF)                    | 0.66                       | 1.11 | 68         | 0.40                                                                                       | 0.79 | 98         | 0.40                                                                                           | 1.14 | 185        | 1.43                                                                                             | 2.00 | 40         | 1.43                                                                                             | 2.23 | 56         |
| 2d   | 2 1 <sup>st</sup> order loops (2a AC AF)                     | 0.66                       | 1.33 | 102        | 0.40                                                                                       | 0.95 | 138        | 0.40                                                                                           | 1.40 | 250        | 1.43                                                                                             | 2.43 | 70         | 1.43                                                                                             | 2.63 | 84         |
| 2e   | 2 1 <sup>st</sup> & 2 2 <sup>nd</sup> order loops (2d & 2c)  | 0.66                       | 1.47 | 123        | 0.40                                                                                       | 1.06 | 165        | 0.40                                                                                           | 1.63 | 308        | 1.43                                                                                             | 2.60 | 82         | 1.43                                                                                             | 2.87 | 101        |
| 2f   | 4 1 <sup>st</sup> & 2 2 <sup>nd</sup> order loops (2e BD BE) | 0.66                       | 2.00 | 203        | 0.40                                                                                       | 1.49 | 273        | 0.40                                                                                           | 2.40 | 500        | 1.43                                                                                             | 3.43 | 140        | 1.43                                                                                             | 3.84 | 169        |
| 2g   | 4 1 <sup>st</sup> order loops (2a AC AF BD BE)               | 0.66                       | 2.00 | 203        | 0.40                                                                                       | 1.49 | 273        | 0.40                                                                                           | 2.40 | 500        | 1.43                                                                                             | 3.43 | 140        | 1.43                                                                                             | 3.84 | 169        |
| 2h   | Fully connected network                                      | 0.66                       | 2.00 | 203        | 0.40                                                                                       | 1.49 | 273        | 0.40                                                                                           | 2.40 | 500        | 1.43                                                                                             | 3.43 | 140        | 1.43                                                                                             | 3.84 | 169        |

**Table 8: Random effects analysis for investigating absence of 1<sup>st</sup> order indirect evidence. Comparison of precision gained for treatment contrast A vs B under five separate scenarios with that achieved from a standard, pairwise meta-analysis. Assuming 'medium' between trial heterogeneity ( $\tau^2 = 0.5$ ). Columns report the precision of A vs B treatment effect estimate from a pairwise meta-analysis of A vs B (std MA), the precision of A vs B from a network meta-analysis (NMA) and the percentage difference between NMA and std MA (Increase %). Each increasing level of the network is illustrated with reference to Figure 2. Explanation of variances assumed for each comparison given in main paper.**

| Fig. | Direct evidence available                                    | 1 trial per comparison (1) |      |            | AB weakest link<br>1 <sup>st</sup> order IC trials weak,<br>2 <sup>nd</sup> order weak (2) |      |            | AB weakest link<br>1 <sup>st</sup> order IC trials strong,<br>2 <sup>nd</sup> order strong (3) |      |            | AB strongest link<br>1 <sup>st</sup> order IC trials strong,<br>2 <sup>nd</sup> order weaker (4) |      |            | AB strongest link<br>1 <sup>st</sup> order IC trials strong,<br>2 <sup>nd</sup> order strong (5) |      |            |
|------|--------------------------------------------------------------|----------------------------|------|------------|--------------------------------------------------------------------------------------------|------|------------|------------------------------------------------------------------------------------------------|------|------------|--------------------------------------------------------------------------------------------------|------|------------|--------------------------------------------------------------------------------------------------|------|------------|
|      |                                                              | Std MA                     | NMA  | Increase % | Std MA                                                                                     | NMA  | Increase % | Std MA                                                                                         | NMA  | Increase % | Std MA                                                                                           | NMA  | Increase % | Std MA                                                                                           | NMA  | Increase % |
| 2a   | AB (AD AE BC BF)                                             | 0.50                       | 0.50 | 0          | 0.33                                                                                       | 0.33 | 0          | 0.33                                                                                           | 0.33 | 0          | 0.83                                                                                             | 0.83 | 0          | 0.83                                                                                             | 0.83 | 0          |
| -    | 1 2 <sup>nd</sup> order loop                                 | 0.50                       | 0.66 | 32         | 0.33                                                                                       | 0.48 | 45         | 0.33                                                                                           | 0.57 | 73         | 0.83                                                                                             | 1.03 | 24         | 0.83                                                                                             | 1.08 | 30         |
| 2b   | 1 1 <sup>st</sup> order & 1 2 <sup>nd</sup> order loop       | 0.50                       | 0.92 | 84         | 0.33                                                                                       | 0.70 | 112        | 0.33                                                                                           | 0.90 | 173        | 0.83                                                                                             | 1.37 | 65         | 0.83                                                                                             | 1.46 | 76         |
| 2c   | 2 2 <sup>nd</sup> -order loops (2a CD EF)                    | 0.50                       | 0.83 | 66         | 0.33                                                                                       | 0.63 | 91         | 0.33                                                                                           | 0.81 | 145        | 0.83                                                                                             | 1.23 | 48         | 0.83                                                                                             | 1.33 | 60         |
| 2d   | 2 1 <sup>st</sup> order loops (2a AC AF)                     | 0.50                       | 1.00 | 100        | 0.33                                                                                       | 0.76 | 130        | 0.33                                                                                           | 1.00 | 203        | 0.83                                                                                             | 1.50 | 81         | 0.83                                                                                             | 1.59 | 92         |
| 2e   | 2 1 <sup>st</sup> & 2 2 <sup>nd</sup> order loops (2d & 2c)  | 0.50                       | 1.10 | 120        | 0.33                                                                                       | 0.85 | 158        | 0.33                                                                                           | 1.15 | 248        | 0.83                                                                                             | 1.62 | 95         | 0.83                                                                                             | 1.74 | 110        |
| 2f   | 4 1 <sup>st</sup> & 2 2 <sup>nd</sup> order loops (2e BD BE) | 0.50                       | 1.50 | 200        | 0.33                                                                                       | 1.19 | 261        | 0.33                                                                                           | 1.66 | 403        | 0.83                                                                                             | 2.17 | 161        | 0.83                                                                                             | 2.34 | 182        |
| 2g   | 4 1 <sup>st</sup> order loops (2a AC AF BD BE)               | 0.50                       | 1.50 | 200        | 0.33                                                                                       | 1.19 | 261        | 0.33                                                                                           | 1.66 | 403        | 0.83                                                                                             | 2.17 | 161        | 0.83                                                                                             | 2.34 | 182        |
| 2h   | Fully connected network                                      | 0.50                       | 1.50 | 200        | 0.33                                                                                       | 1.19 | 261        | 0.33                                                                                           | 1.66 | 403        | 0.83                                                                                             | 2.17 | 161        | 0.83                                                                                             | 2.34 | 182        |

**Table 9: Random effects analysis for investigating absence of 1<sup>st</sup> order indirect evidence. Comparison of precision gained for treatment contrast A vs B under five separate scenarios with that achieved from a standard, pairwise meta-analysis. Assuming ‘high’ between trial heterogeneity ( $\tau^2 = 1$ ). Columns report the precision of A vs B treatment effect estimate from a pairwise meta-analysis of A vs B (std MA), the precision of A vs B from a network meta-analysis (NMA) and the percentage difference between NMA and std MA (Increase %). Each increasing level of the network is illustrated with reference to Figure 2. Explanation of variances assumed for each comparison given in main paper.**
