# Supplementary material for: Extending Treatment Networks in Health Technology Assessment: How Far Should We Go?
Source: PubMed Central journal article supplement (PMC4553939; doi:10.1016/j.jval.2015.03.1792), 2015-07
Supplement: mmc3.pdf [file mmc3.pdf]

### Appendix 3: Sensitivity analysis for impact of second order indirect evidence

Fixed effect indirect missing analysis. Weak direct evidence for AB, weak first order indirect and very strong 2<sup>nd</sup>-order indirect evidence

Note values of precision of evidence are arbitrary and were chosen for convenience. Precision for each order of evidence reported above results

|             |                                                              | <b>Scenario 1</b><br>Direct evidence= 0.2<br>1 <sup>st</sup> order = 0.1<br>2 <sup>nd</sup> order = 20 |      |            | <b>Scenario 2</b><br>Direct evidence= 0.2<br>1 <sup>st</sup> order = 0.2<br>2 <sup>nd</sup> order = 20 |      |            | <b>Scenario 3</b><br>Direct evidence= 0.2<br>1 <sup>st</sup> order = 0.5<br>2 <sup>nd</sup> order = 20 |      |            | <b>Scenario 4</b><br>Direct evidence= 0.2<br>1 <sup>st</sup> order = 0.05<br>2 <sup>nd</sup> order = 20 |      |            |
|-------------|--------------------------------------------------------------|--------------------------------------------------------------------------------------------------------|------|------------|--------------------------------------------------------------------------------------------------------|------|------------|--------------------------------------------------------------------------------------------------------|------|------------|---------------------------------------------------------------------------------------------------------|------|------------|
| <b>Fig.</b> | <b>Evidence included in network</b>                          | <b>Precision gained (% increase)</b>                                                                   |      |            | <b>Precision gained (% increase)</b>                                                                   |      |            | <b>Precision gained (% increase)</b>                                                                   |      |            | <b>Precision gained (% increase)</b>                                                                    |      |            |
|             |                                                              | Std MA                                                                                                 | NMA  | Increase % | Std MA                                                                                                 | NMA  | Increase % | Std MA                                                                                                 | NMA  | Increase % | Std MA                                                                                                  | NMA  | Increase % |
| 2a          | AB (AD AE BC BF)                                             | 0.20                                                                                                   | 0.20 | 0          | 0.20                                                                                                   | 0.20 | 0          | 0.20                                                                                                   | 0.20 | 0          | 0.20                                                                                                    | 0.20 | 0          |
| -           | 1 2 <sup>nd</sup> order loop                                 | 0.20                                                                                                   | 0.23 | 15         | 0.20                                                                                                   | 0.27 | 35         | 0.20                                                                                                   | 0.37 | 85         | 0.20                                                                                                    | 0.22 | 10         |
| -           | 1 1 <sup>st</sup> order loop                                 | 0.20                                                                                                   | 0.25 | 25         | 0.20                                                                                                   | 0.30 | 50         | 0.20                                                                                                   | 0.45 | 125        | 0.20                                                                                                    | 0.23 | 15         |
| 2b          | 1 1 <sup>st</sup> order & 1 2 <sup>nd</sup> order loop       | 0.20                                                                                                   | 0.30 | 50         | 0.20                                                                                                   | 0.40 | 100        | 0.20                                                                                                   | 0.70 | 250        | 0.20                                                                                                    | 0.25 | 25         |
| 2c          | 2 2 <sup>nd</sup> -order loops (2a CD EF)                    | 0.20                                                                                                   | 0.30 | 50         | 0.20                                                                                                   | 0.40 | 100        | 0.20                                                                                                   | 0.69 | 245        | 0.20                                                                                                    | 0.25 | 25         |
| 2d          | 2 1 <sup>st</sup> order loops (2a AC AF)                     | 0.20                                                                                                   | 0.30 | 50         | 0.20                                                                                                   | 0.40 | 100        | 0.20                                                                                                   | 0.70 | 250        | 0.20                                                                                                    | 0.25 | 25         |
| 2e          | 2 1 <sup>st</sup> & 2 2 <sup>nd</sup> order loops (2c & 2d)  | 0.20                                                                                                   | 0.33 | 65         | 0.20                                                                                                   | 0.47 | 135        | 0.20                                                                                                   | 0.86 | 330        | 0.20                                                                                                    | 0.27 | 35         |
| 2f          | 4 1 <sup>st</sup> & 2 2 <sup>nd</sup> order loops (2e BD BE) | 0.20                                                                                                   | 0.40 | 100        | 0.20                                                                                                   | 0.60 | 200        | 0.20                                                                                                   | 1.20 | 500        | 0.20                                                                                                    | 0.30 | 50         |
| 2g          | 4 1 <sup>st</sup> order loops (2a AC AF BD BE)               | 0.20                                                                                                   | 0.40 | 100        | 0.20                                                                                                   | 0.60 | 200        | 0.20                                                                                                   | 1.20 | 500        | 0.20                                                                                                    | 0.30 | 50         |
| 2h          | Fully connected network                                      | 0.20                                                                                                   | 0.40 | 100        | 0.20                                                                                                   | 0.60 | 200        | 0.20                                                                                                   | 1.20 | 500        | 0.20                                                                                                    | 0.30 | 50         |
